# Supplementary material for: Severe Corrosion of Carbon Steel in Oil Field Produced Water Can Be Linked to Methanogenic Archaea Containing a Special Type of [NiFe] Hydrogenase
Source: PubMed Central journal article supplement (PMC7848899; doi:10.1128/aem.01819-20), 2021-01-15
Supplement: AEM.01819-20-s0001.pdf [file AEM.01819-20-s0001.pdf]

**Table S1** Top 25 hits for a protein sequence BLAST (BlastP) search of MicH against NCBI's non-redundant protein database.

| Putative function                          | Closest taxonomic classification             | Total BlastP score | Query coverage (%) | E-value  | Sequence identity (%) | Accession No.  |
|--------------------------------------------|----------------------------------------------|--------------------|--------------------|----------|-----------------------|----------------|
| nickel-dependent hydrogenase large subunit | <i>Methanococcus maripaludis</i> OS7         | 1026               | 100                | 0.0E+00  | 100.0                 | WP_119846095.1 |
| hypothetical protein                       | <i>Methanobacterium</i> sp.                  | 946                | 98                 | 0.0E+00  | 93.5                  | RJS49388.1     |
| hypothetical protein                       | <i>Methanobacteriales</i>                    | 887                | 98                 | 0.0E+00  | 90.7                  | PKL67834.1     |
| nickel-dependent hydrogenase large subunit | <i>Methanobacterium congolense</i> Buetzberg | 884                | 98                 | 0.0E+00  | 90.7                  | WP_071906935.1 |
| hypothetical protein                       | <i>Methanopyrus</i> sp. SNP6                 | 340                | 96                 | 9.0E-108 | 40.7                  | WP_148689234.1 |
| hypothetical protein                       | <i>Bacteria</i>                              | 176                | 96                 | 2.0E-45  | 28.5                  | NL199272.1     |
| Ni/Fe hydrogenase subunit alpha            | Ca. <i>Korarchaeota</i>                      | 170                | 96                 | 2.0E-43  | 28.8                  | HDD68771.1     |
| Fe hydrogenase                             | <i>Phycisphaerae</i>                         | 170                | 98                 | 4.0E-43  | 29.0                  | KPK74792.1     |
| Ni/Fe hydrogenase subunit alpha            | <i>Desulfosporosinus</i> sp. Sb-LF           | 168                | 96                 | 2.0E-42  | 28.0                  | WP_135380469.1 |
| Ni/Fe hydrogenase subunit alpha            | <i>Nitrosomonadales</i>                      | 168                | 96                 | 2.0E-42  | 29.5                  | PWB56486.1     |
| Ni/Fe hydrogenase subunit alpha            | <i>Sulfuritalea hydrogenivorans</i>          | 167                | 98                 | 2.0E-42  | 29.4                  | WP_041099025.1 |
| Ni/Fe hydrogenase subunit alpha            | <i>Archaea</i>                               | 167                | 96                 | 4.0E-42  | 28.6                  | HEA10786.1     |
| Ni/Fe hydrogenase subunit alpha            | <i>Nitrospira</i> sp. Nsp13                  | 166                | 96                 | 7.0E-42  | 29.2                  | WP_090907184.1 |
| Ni/Fe hydrogenase subunit alpha            | <i>Nitrospira multiformis</i>                | 166                | 96                 | 8.0E-42  | 28.7                  | WP_107761584.1 |
| Ni/Fe hydrogenase subunit alpha            | candidate division WOR-3                     | 165                | 97                 | 1.0E-41  | 28.2                  | HHR48257.1     |
| Ni/Fe hydrogenase subunit alpha            | candidate division WOR-3                     | 165                | 97                 | 2.0E-41  | 27.9                  | HGU47450.1     |
| NADP oxidoreductase                        | <i>Nitrosomonadales</i>                      | 165                | 96                 | 2.0E-41  | 29.0                  | ODT84812.1     |
| Ni/Fe hydrogenase subunit alpha            | <i>Nitrosomonadales</i>                      | 165                | 96                 | 2.0E-41  | 29.5                  | TFH12556.1     |
| Ni/Fe hydrogenase subunit alpha            | candidate division WOR-3                     | 164                | 97                 | 4.0E-41  | 28.7                  | HGK62977.1     |
| Ni/Fe hydrogenase subunit alpha            | Ca. <i>Bathyarchaeota</i>                    | 163                | 96                 | 6.0E-41  | 28.5                  | HGD66108.1     |
| Ni/Fe hydrogenase subunit alpha            | <i>Nitrospira lacus</i>                      | 164                | 96                 | 8.0E-41  | 29.9                  | WP_004174406.1 |
| nickel-dependent hydrogenase large subunit | <i>Aquisphaera</i> sp. JC650                 | 163                | 98                 | 9.0E-41  | 29.4                  | WP_152053939.1 |
| F420-non-reducing hydrogenase subunit A    | <i>Lokiarchaeum</i> sp. GC14_75              | 163                | 96                 | 9.0E-41  | 27.9                  | KKK40681.1     |
| Ni/Fe hydrogenase subunit alpha            | <i>Firmicutes</i>                            | 163                | 98                 | 9.0E-41  | 27.9                  | PKM81450.1     |
| Ni/Fe hydrogenase subunit alpha            | <i>Anaerolineae</i>                          | 163                | 96                 | 1.0E-40  | 30.3                  | HGY48290.1     |

**Table S2** Additional details for corrosion tests shown in the main manuscript. For easier identification the description matches the labelling of tests in individual figures.

| Experiment                                                 | Test No. | Description          | Medium                                    | Inoculum                                                                                               | Incubation temperature (°C) | Test duration | Weight loss corrosion rate (mm/yr) | Shown in manuscript |
|------------------------------------------------------------|----------|----------------------|-------------------------------------------|--------------------------------------------------------------------------------------------------------|-----------------------------|---------------|------------------------------------|---------------------|
| Temperature dependency in sulfate-free produced water      | 1        | Sterile at 32°C      | Nigerian produced water collected in 2014 | Sterile                                                                                                | 32                          | 13 weeks      | 0.00 ± 0.00                        | Figure 2A - C       |
|                                                            | 2        | Sterile at 60°C      | Nigerian produced water collected in 2014 | Sterile                                                                                                | 60                          | 13 weeks      | 0.02 ± 0.00                        | Figure 2A - C       |
|                                                            | 3        | 32°C                 | Nigerian produced water collected in 2014 | Microorganism contained in produced water                                                              | 32                          | 13 weeks      | 0.19 ± 0.09                        | Figure 2A - C       |
|                                                            | 4        | 32°C                 | Nigerian produced water collected in 2014 | Microorganism contained in produced water                                                              | 32                          | 13 weeks      | 0.19 ± 0.08                        | Figure 2A - C       |
|                                                            | 5        | 60°C                 | Nigerian produced water collected in 2014 | Microorganism contained in produced water                                                              | 60                          | 13 weeks      | 0.02 ± 0.01                        | Figure 2A - C       |
|                                                            | 6        | 60°C                 | Nigerian produced water collected in 2014 | Microorganism contained in produced water                                                              | 60                          | 13 weeks      | 0.03 ± 0.01                        | Figure 2A - C       |
| Sulfate amendment in original and synthetic produced water | 7        | Sterile medium       | Synthetic produced water                  | Sterile                                                                                                | 32                          | 6 weeks       | 0.03 ± 0.00                        | Figure 2D - F       |
|                                                            | 8        | Sterile medium       | Synthetic produced water                  | Sterile                                                                                                | 32                          | 6 weeks       | 0.03 ± 0.01                        | Figure 2D - F       |
|                                                            | 9        | Produced water       | Nigerian produced water collected in 2016 | Microorganism contained in produced water                                                              | 32                          | 11 weeks      | 0.31 ± 0.04                        | Figure 2D - F       |
|                                                            | 10       | Produced water       | Nigerian produced water collected in 2016 | Microorganism contained in produced water                                                              | 32                          | 11 weeks      | 0.15 ± 0.04                        | Figure 2D - F       |
|                                                            | 11       | Organotrophic medium | Synthetic produced water                  | 0.5% (v/v) of 2016 produced water                                                                      | 32                          | 11 weeks      | 0.06 ± 0.02                        | Figure 2D - F       |
|                                                            | 12       | Organotrophic medium | Synthetic produced water                  | 0.5% (v/v) of 2016 produced water                                                                      | 32                          | 11 weeks      | 0.07 ± 0.02                        | Figure 2D - F       |
|                                                            | 13       | Lithotrophic medium  | Synthetic produced water                  | 0.5% (v/v) of 2016 produced water                                                                      | 32                          | 11 weeks      | 0.08 ± 0.04                        | Figure 2D - F       |
|                                                            | 14       | Lithotrophic medium  | Synthetic produced water                  | 0.5% (v/v) of 2016 produced water                                                                      | 32                          | 11 weeks      | 0.76 ± 0.15                        | Figure 2D - F       |
| Corrosion kettle tests                                     | 15       | Sterile medium       | Synthetic produced water                  | Sterile                                                                                                | 32                          | 7 weeks       | 0.34 ± 0.01                        | Figure 3B           |
|                                                            | 16       | Produced water       | Nigerian produced water collected in 2016 | Microorganism contained in produced water                                                              | 32                          | 7 weeks       | 0.54 ± 0.14                        | Figure 3B           |
|                                                            | 17       | Lithotrophic medium  | Synthetic produced water                  | 0.5% (v/v) from lithotrophic test No. 14                                                               | 32                          | 7 weeks       | 1.62 ± 0.72                        | Figure 3B           |
|                                                            | 18       | Organotrophic medium | Synthetic produced water                  | 0.5% (v/v) organotrophic enrichment (3rd transfer) from 2016 collected produced water (not shown here) | 32                          | 7 weeks       | 0.07 ± 0.00                        | Figure 3B           |

**Table S3** Microorganisms used as negative controls to evaluate *micH* qPCR assay.

| Organism name                                   | Genome Accession No. | Origin                                                        | Country                          | Genome status | <i>micH</i> detected |
|-------------------------------------------------|----------------------|---------------------------------------------------------------|----------------------------------|---------------|----------------------|
| <i>Archaeoglobus fulgidus</i> ATCC 49558        | NC_000917.1          | Hot Spring                                                    | Italy                            | Complete      | –                    |
| <i>Burkholderia thailandensis</i> ATCC 700388   | NC_007651.1          | Rice field soil                                               | Thailand                         | Complete      | –                    |
| <i>Desulfovibrio vulgaris</i> ATCC 29579        | NC_002937.3          | Wealden clay                                                  | United Kingdom                   | Complete      | –                    |
| <i>Eubacterium limosum</i> ATCC 8486            | NZ_CP019962.1        | Human intestinal content                                      | Germany                          | Complete      | –                    |
| <i>Geobacter metallireducens</i> ATCC 53774     | NC_007517.1          | Fresh water sediment, Maryland                                | United States                    | Complete      | –                    |
| <i>Geobacter sulfurreducens</i> ATCC 51573      | NC_002939.5          | Surface sediment, Oklahoma                                    | United States                    | Complete      | –                    |
| <i>Methanobacterium bryantii</i> ATCC 33272     | NZ_LMVM0000000.1     | Syntrophic culture of " <i>Methanobacterium omelianskii</i> " | NA                               | Draft         | –                    |
| <i>Methanocaldococcus jannaschii</i> ATCC 43067 | NC_000909.1          | Submarine hydrothermal vent                                   | Pacific Ocean, East Pacific Rise | Complete      | –                    |
| <i>Methanococcus voltae</i> ATCC BAA-1334       | CP002057.1           | Salt marsh, Florida                                           | United States                    | Complete      | –                    |
| <i>Methanoculleus bourgensis</i> ATCC 43281     | NC_018227.2          | Tannery sewage sludge                                         | France                           | Complete      | –                    |
| <i>Methanomicrobium mobile</i> ATCC 35094       | NZ_JOMF0000000.1     | Bovine rumen                                                  | United States                    | Draft         | –                    |
| <i>Nitrosomonas europaea</i> ATCC 19718         | NC_004757.1          | NA                                                            | NA                               | Complete      | –                    |
| <i>Roseobacter denitrificans</i> ATCC 33942     | NC_008209.1          | Seaweed                                                       | NA                               | Complete      | –                    |
| <i>Shewanella denitrificans</i> ATCC BAA-1090   | NC_007954.1          | Water column, 130 m depth                                     | Baltic Sea                       | Complete      | –                    |
| <i>Thiobacillus denitrificans</i> ATCC 25259    | NC_007404.1          | Soil, Texas                                                   | United States                    | Complete      | –                    |

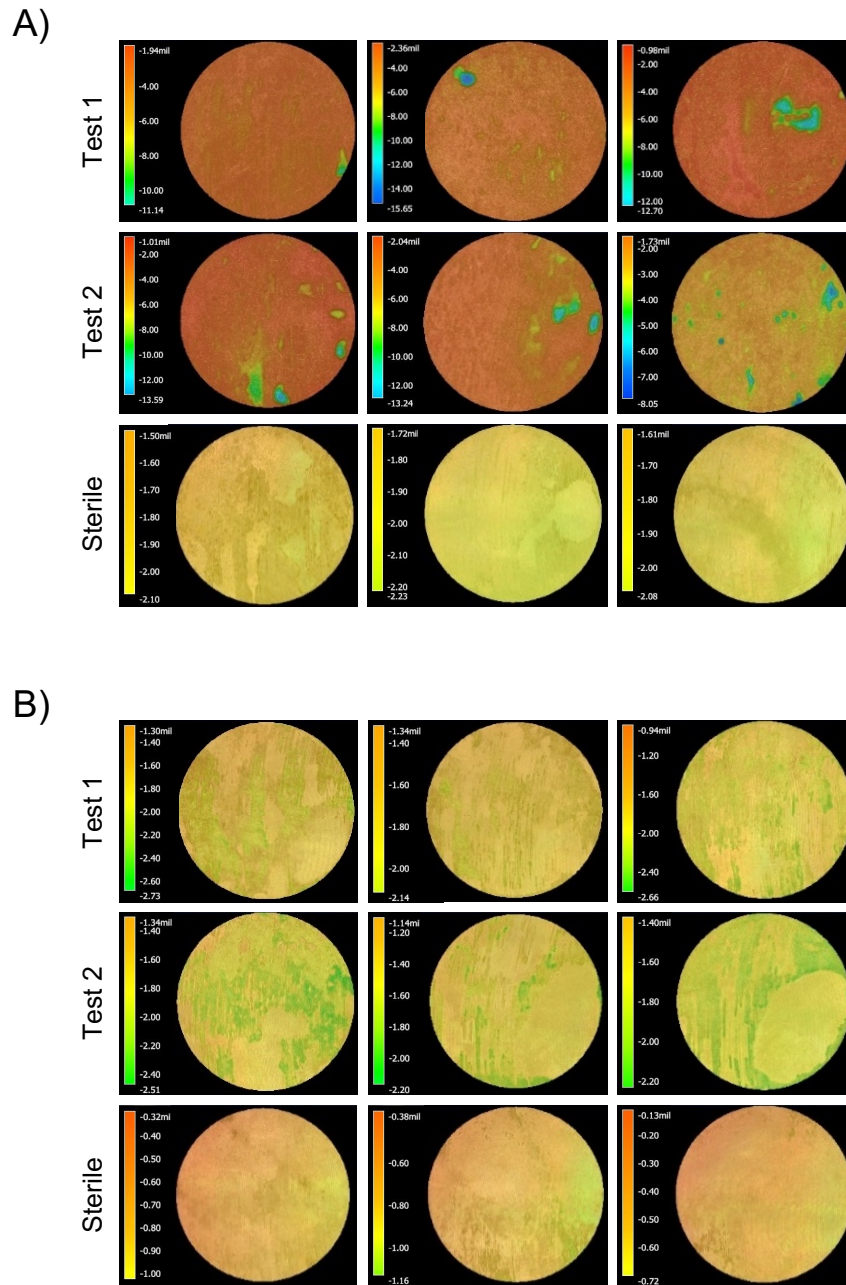

**Figure S1** Surface topography of cleaned X52 carbon steel weight loss corrosion coupons after exposure to produced water at A) 32°C and B) 60°C. See Figure 2A for corresponding weight loss corrosion data.

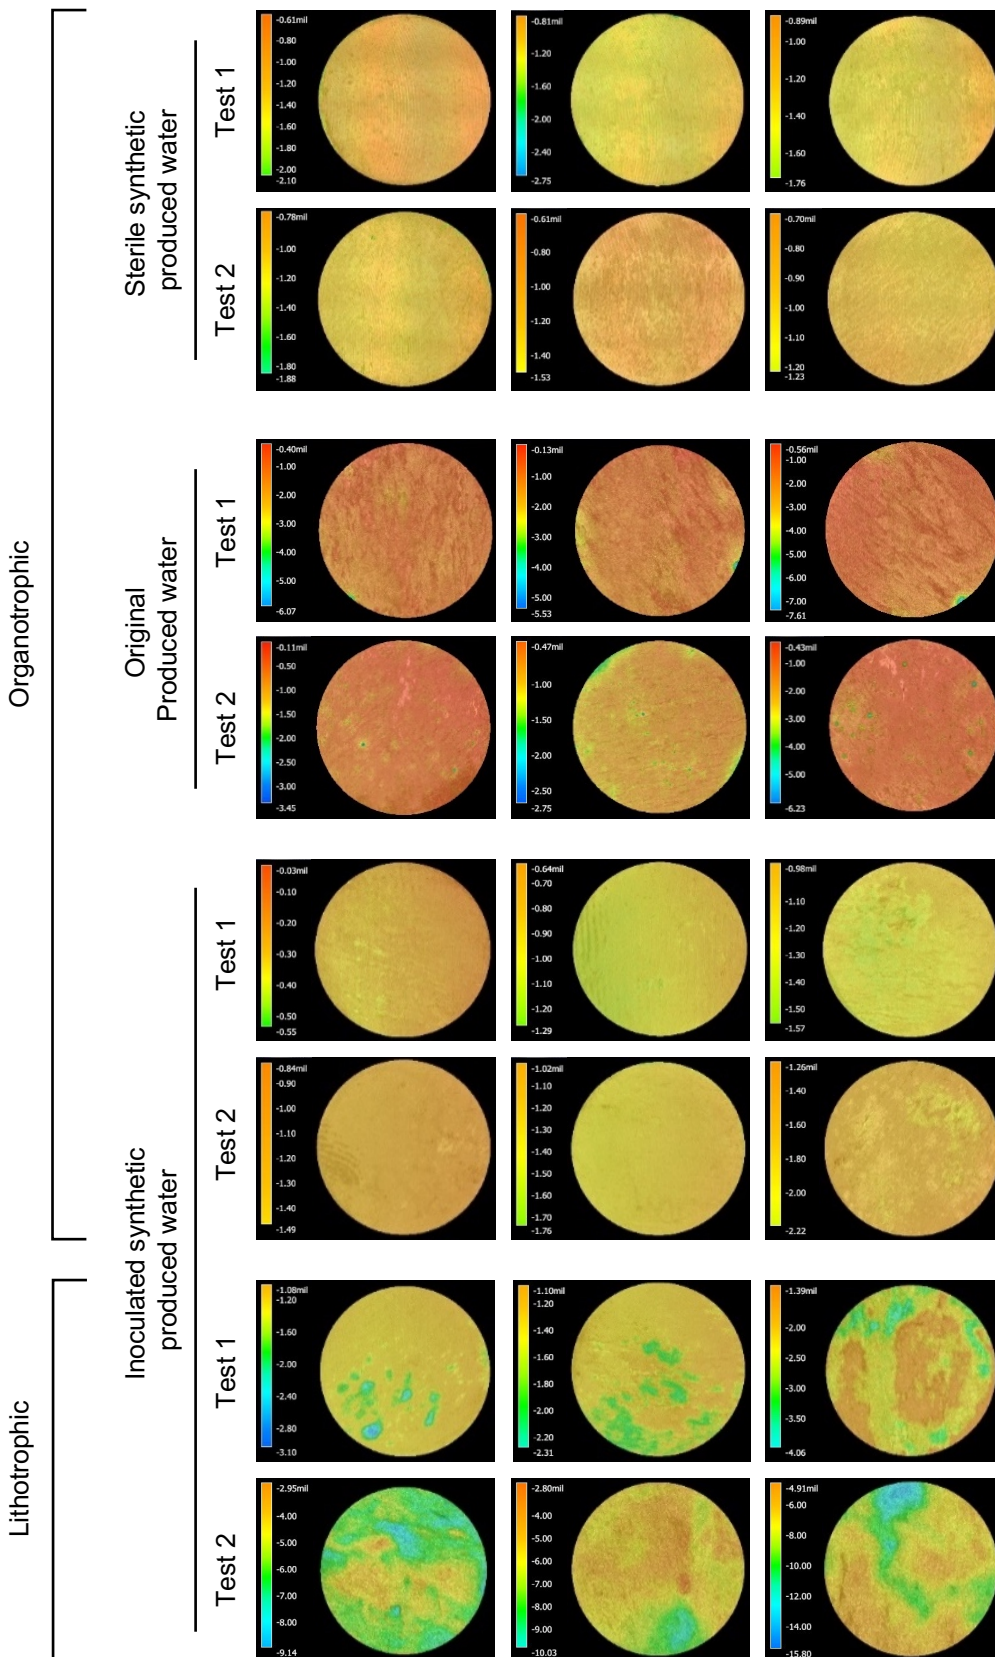

**Figure S2** Surface topography of cleaned X52 carbon steel weight loss corrosion coupons after exposure to original produced water, sterile or inoculated synthetic produced water at 32°C under organotrophic or lithotrophic conditions. See Figure 2D for corresponding weight loss corrosion data.

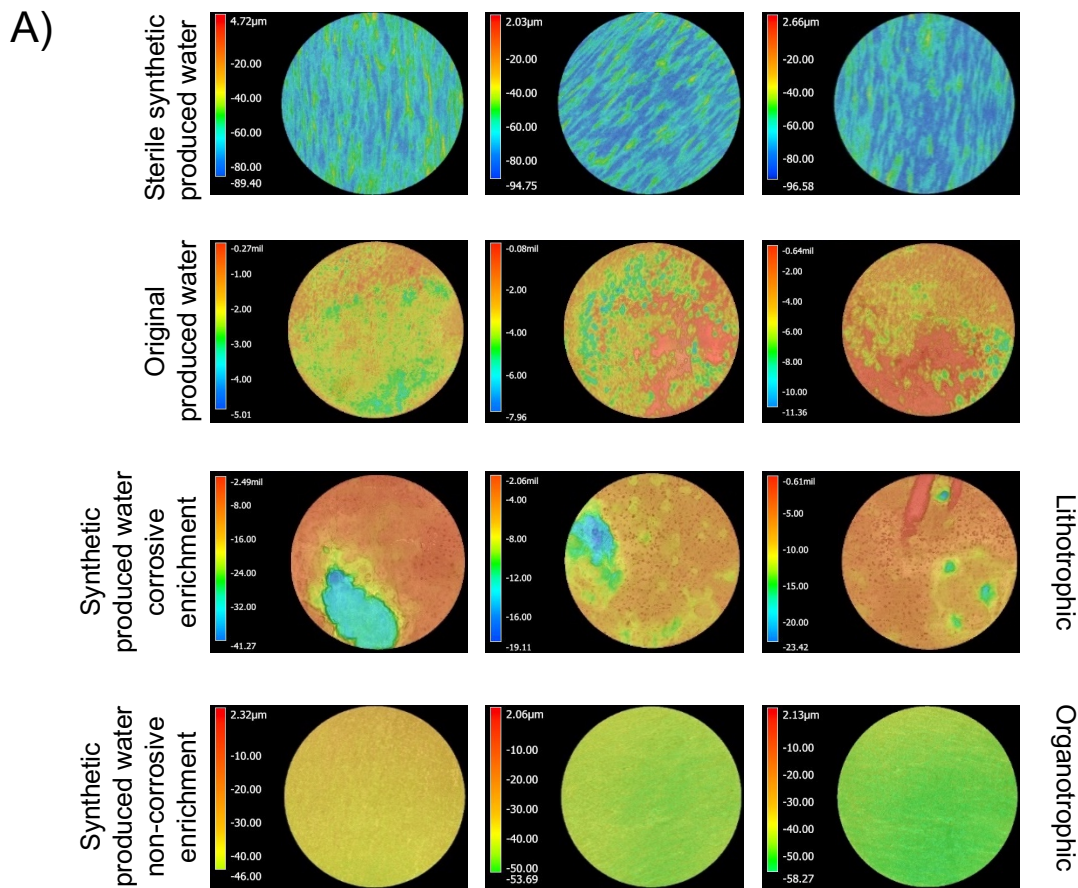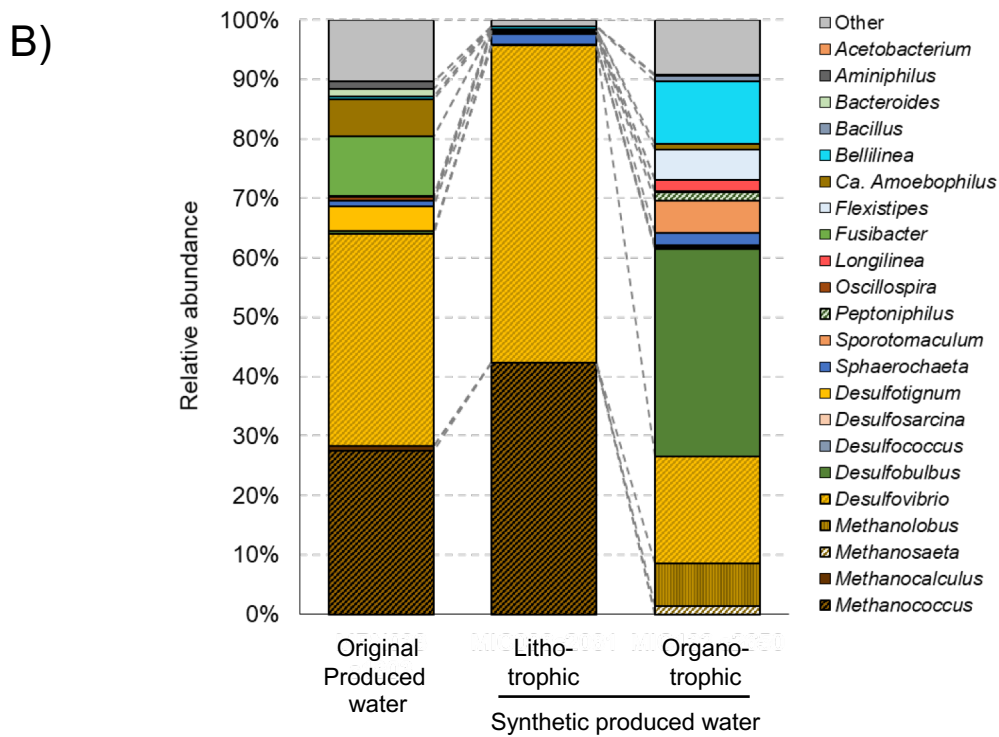

**Figure S3** A) Surface topography of cleaned X52 carbon steel weight loss corrosion coupons after exposure to produced water or synthetic produced water under simulated pipeline conditions in customized reactors. See Figure 3D for corresponding weight loss corrosion data. B) Microbial community composition on carbon steel coupon surfaces after incubation in customized reactors under simulated pipeline conditions. See Figure 3D for weight loss corrosion rates.



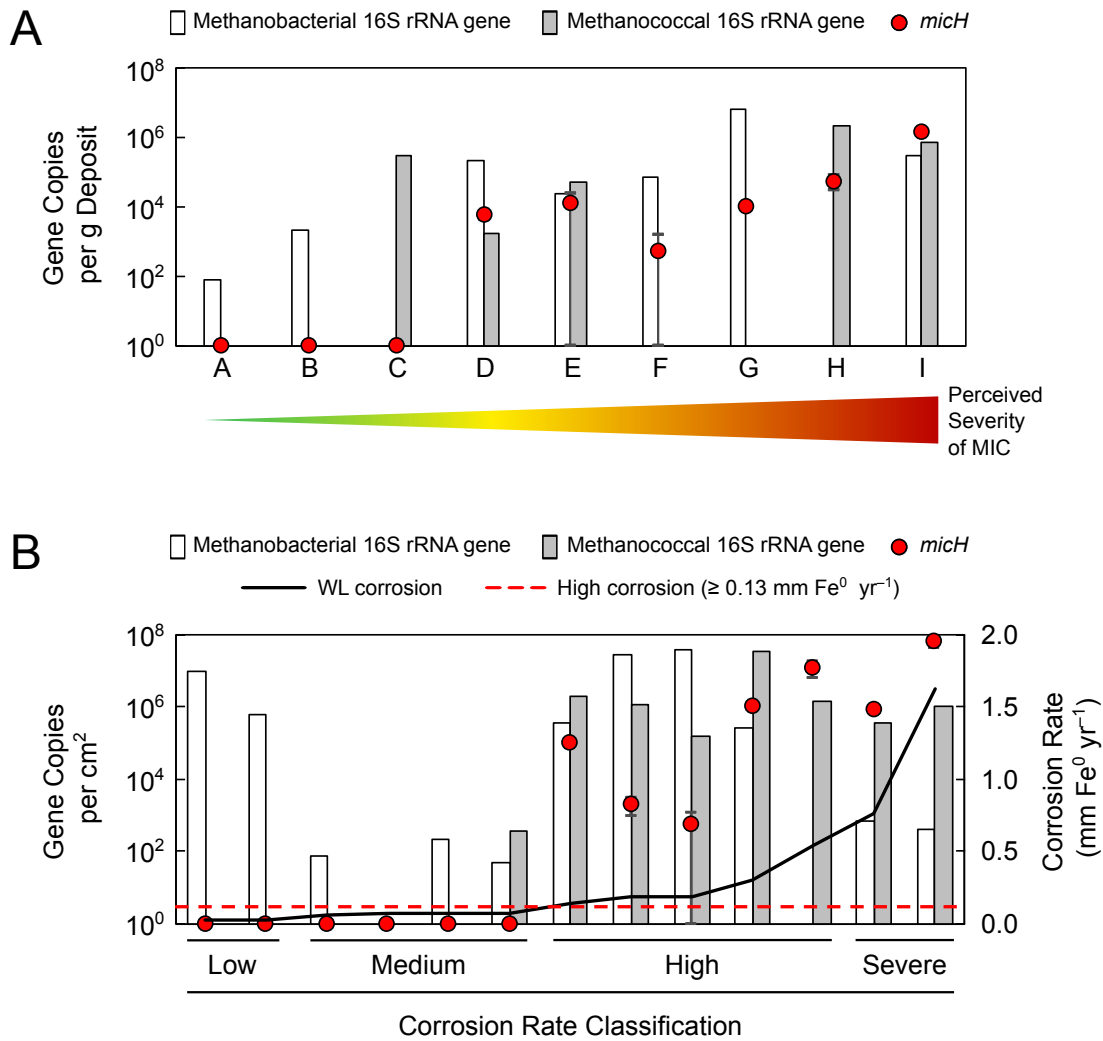

**Figure S4** Comparison of corrosion rate, *micH* gene copies and estimated methanococcal and methanobacterial 16S rRNA gene copies in A) pigging debris samples shown in Figure 1 and B) laboratory tests shown in Figures 2 and 3. Genus specific estimated 16S rRNA gene copies were calculated from total 16S rRNA gene copy numbers obtained by qPCR and relative community composition data from 16S rRNA gene amplicon sequencing. The error bars associated with *micH* qPCR results depict the standard deviation of technical replication (n=3).

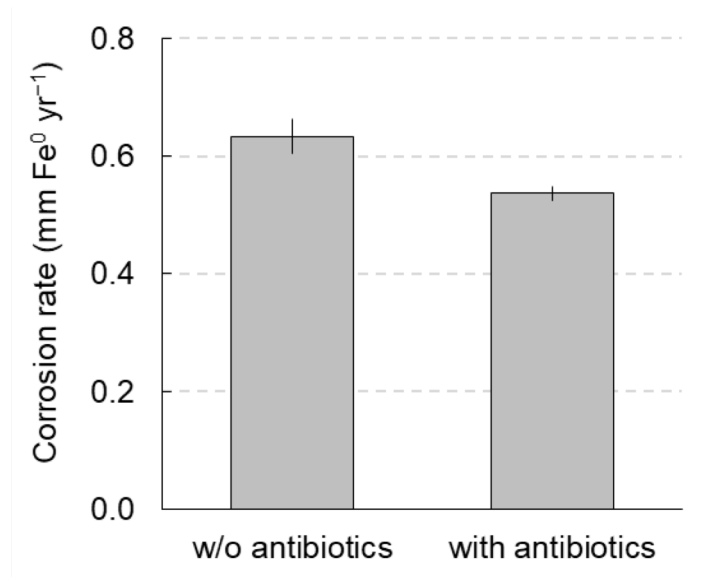

**Figure S5** Comparison of corrosion rate in kettle tests using sterile synthetic produced water treated with or without (w/o) antibiotics.





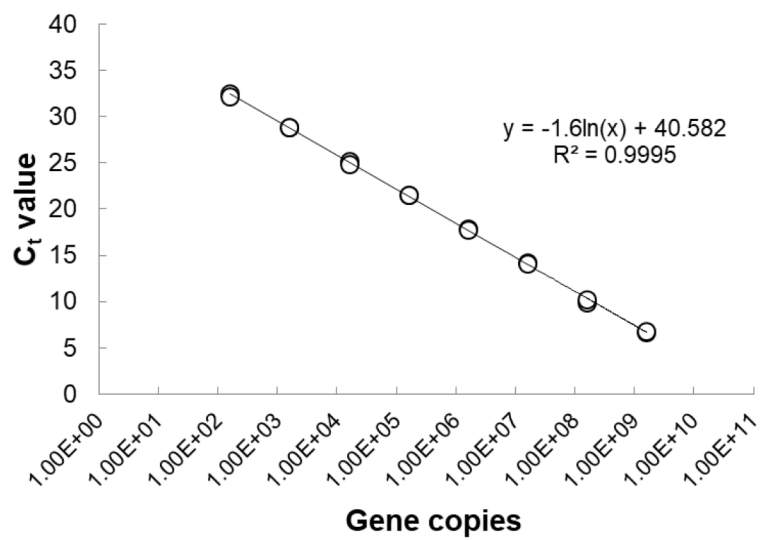

**Figure S7** Calibration curve of quantitative PCR using a synthetic fragments of *micH* gene as target and the newly developed primer pair and Taqman™ probe.
